# Supplementary material for: Genotype-phenotype correlations of Berardinelli-Seip congenital lipodystrophy and novel candidate genes prediction
Source: PubMed Central journal article supplement (PMC7191718; doi:10.1186/s13023-020-01383-y), 2020-04-29
Supplement: 13023_2020_1383_MOESM1_ESM.pdf [file 13023_2020_1383_MOESM1_ESM.pdf]

Table 1 The cases with AGPAT2 or BSCL2 mutations we collected were from these articles in the table.

| Author (year)                  | Number of cases |
|--------------------------------|-----------------|
| Van Maldergem L.2002(1)        | 58              |
| Lima JG.2018(2)                | 12              |
| Agarwal AK.2003(3)             | 17              |
| Agarwal AK.2002(4)             | 20              |
| Haghighi A.2015(5)             | 10              |
| Akinci B.2016(6)               | 27              |
| Araujo-Vilar D.2015(7)         | 6               |
| Fu M.2004(8)                   | 29              |
| Opri R.2016(9)                 | 3               |
| Barra CB.2011(10)              | 4               |
| Ben Turkia H.2009(11)          | 1               |
| Bhayana S.2002(12)             | 1               |
| Debray FG.2013(13)             | 1               |
| Huang HH.2010(14)              | 1               |
| Shirwalkar HU.2008(15)         | 1               |
| Ebihara K.2004(16)             | 3               |
| Nishiyama A.2009(17)           | 2               |
| Jin J.2007(18)                 | 1               |
| Friguls B.2009(19)             | 1               |
| Ferraria N.2013(20)            | 3               |
| Haghighi A.2012(21)            | 2               |
| Hann G.2013(22)                | 1               |
| Jeninga EH.2012(23)            | 1               |
| Metwalley KA.2014(24)          | 1               |
| Solanki M.2008(25)             | 2               |
| Victoria B.2010(26)            | 1               |
| Simsir IY.2017(27)             | 1               |
| Purizaca-Rosillo N.2017(28)    | 6               |
| Su X.2017(29)                  | 3               |
| Chen R.2017(30)                | 2               |
| Ponte CMM.2018(31)             | 7               |
| Lima JG.2017(32)               | 11              |
| Dantas de Medeiros JL.2018(33) | 11              |
| Gonzalo MM.2017(34)            | 1               |

1. Van Maldergem L, Magre J, Khallouf TE, Gedde-Dahl T, Jr., Delepine M, Trygstad O, et al. Genotype-phenotype relationships in Berardinelli-Seip congenital lipodystrophy. *J Med Genet.* 2002;39(10):722-33.
2. Lima JG, Nobrega LHC, Lima NN, Dos Santos MCF, Silva PHD, Baracho MFP, et al. Causes of death in patients with Berardinelli-Seip congenital generalized lipodystrophy. *PLoS One.* 2018;13(6):e0199052.
3. Agarwal AK, Simha V, Oral EA, Moran SA, Gorden P, O'Rahilly S, et al. Phenotypic and genetic heterogeneity in congenital generalized lipodystrophy. *J Clin Endocrinol Metab.* 2003;88(10):4840-7.
4. Agarwal AK, Arioglu E, De Almeida S, Akkoc N, Taylor SI, Bowcock AM, et al. AGPAT2 is mutated in congenital generalized lipodystrophy linked to chromosome 9q34. *Nat Genet.* 2002;31(1):21-3.
5. Haghghi A, Kavehmanesh Z, Haghghi A, Salehzadeh F, Santos-Simarro F, Van Maldergem L, et al. Congenital generalized lipodystrophy: identification of novel variants and expansion of clinical spectrum. *Clin Genet.* 2016;89(4):434-41.
6. Akinci B, Onay H, Demir T, Ozen S, Kayserili H, Akinci G, et al. Natural History of Congenital Generalized Lipodystrophy: A Nationwide Study From Turkey. *J Clin Endocrinol Metab.* 2016;101(7):2759-67.
7. Araujo-Vilar D, Sanchez-Iglesias S, Guillin-Amarelle C, Castro A, Lage M, Pazos M, et al. Recombinant human leptin treatment in genetic lipodystrophic syndromes: the long-term Spanish experience. *Endocrine.* 2015;49(1):139-47.
8. Fu M, Kazlauskaitė R, Baracho Mde F, Santos MG, Brandao-Neto J, Villares S, et al. Mutations in Gng3lg and AGPAT2 in Berardinelli-Seip congenital lipodystrophy and Brunzell syndrome: phenotype variability suggests important modifier effects. *J Clin Endocrinol Metab.* 2004;89(6):2916-22.
9. Opri R, Fabrizi GM, Cantalupo G, Ferrarini M, Simonati A, Dalla Bernardina B, et al. Progressive Myoclonus Epilepsy in Congenital Generalized Lipodystrophy type 2: Report of 3 cases and literature review. *Seizure.* 2016;42:1-6.
10. Barra CB, Savoldelli RD, Manna TD, Kim CA, Magre J, Porta G, et al. [Genetic and metabolic description of five patients with Berardinelli-Seip syndrome]. *Arq Bras Endocrinol Metabol.* 2011;55(1):54-9.
11. Ben Turkia H, Tebib N, Azzouz H, Abdelmoula MS, Ben Chehida A, Hubert P, et al. [Congenital generalized lipodystrophy: a case report with neurological involvement]. *Arch Pediatr.* 2009;16(1):27-31.
12. Bhayana S, Siu VM, Joubert GI, Clarkson CL, Cao H, Hegele RA. Cardiomyopathy in congenital complete lipodystrophy. *Clin Genet.* 2002;61(4):283-7.
13. Debray FG, Baguette C, Colinet S, Van Maldergem L, Verellen-Dumouin C. Early infantile cardiomyopathy and liver disease: a multisystemic disorder caused by congenital lipodystrophy. *Mol Genet Metab.* 2013;109(2):227-9.
14. Huang HH, Chen TH, Hsiao HP, Huang CT, Wang CC, Shiau YH, et al. A Taiwanese boy with congenital generalized lipodystrophy caused by homozygous Ile262fs mutation in the BSCL2 gene. *Kaohsiung J Med Sci.* 2010;26(11):615-20.
15. Shirwalkar HU, Patel ZM, Magre J, Hilbert P, Van Maldergem L, Mukhopadhyay

RR, et al. Congenital generalized lipodystrophy in an Indian patient with a novel mutation in BSCL2 gene. *J Inherit Metab Dis.* 2008;31 Suppl 2:S317-22.

16. Ebihara K, Kusakabe T, Masuzaki H, Kobayashi N, Tanaka T, Chusho H, et al. Gene and phenotype analysis of congenital generalized lipodystrophy in Japanese: a novel homozygous nonsense mutation in seipin gene. *J Clin Endocrinol Metab.* 2004;89(5):2360-4.

17. Nishiyama A, Yagi M, Awano H, Okizuka Y, Maeda T, Yoshida S, et al. Two Japanese infants with congenital generalized lipodystrophy due to BSCL2 mutations. *Pediatr Int.* 2009;51(6):775-9.

18. Jin J, Cao L, Zhao Z, Shen S, Kiess W, Zhi D, et al. Novel BSCL2 gene mutation E189X in Chinese congenital generalized lipodystrophy child with early onset diabetes mellitus. *Eur J Endocrinol.* 2007;157(6):783-7.

19. Friguls B, Coroleu W, del Alcazar R, Hilbert P, Van Maldergem L, Pintos-Morell G. Severe cardiac phenotype of Berardinelli-Seip congenital lipodystrophy in an infant with homozygous E189X BSCL2 mutation. *Eur J Med Genet.* 2009;52(1):14-6.

20. Ferrara N, Pedrosa C, Amaral D, Lopes L. Berardinelli-Seip syndrome: highlight of treatment challenge. *BMJ Case Rep.* 2013;2013.

21. Haghighi A, Razzaghy-Azar M, Talea A, Sadeghian M, Ellard S, Haghighi A. Identification of a novel nonsense mutation and a missense substitution in the AGPAT2 gene causing congenital generalized lipodystrophy type 1. *Eur J Med Genet.* 2012;55(11):620-4.

22. Hann G, Salam A, Kapila P. An incidental finding of striking muscular hypertrophy leading to a diagnosis of Berardinelli Seip Congenital Lipodystrophy. *Arch Dis Child.* 2013;98(12):933.

23. Jeninga EH, de Vroede M, Hamers N, Breur JM, Verhoeven-Duif NM, Berger R, et al. A Patient with Congenital Generalized Lipodystrophy Due To a Novel Mutation in BSCL2: Indications for Secondary Mitochondrial Dysfunction. *JIMD Rep.* 2012;4:47-54.

24. Metwalley KA, Farghaly HS. Berardinelli-Seip syndrome type 1 in an Egyptian child. *Indian J Hum Genet.* 2014;20(1):75-8.

25. Solanki M, Patil SS, Baweja DK, Noorani H, Pk S. Talon cusps, macrodontia, and aberrant tooth morphology in Berardinelli-Seip syndrome. *Oral Surg Oral Med Oral Pathol Oral Radiol Endod.* 2008;105(1):e41-7.

26. Victoria B, Cabezas-Agricola JM, Gonzalez-Mendez B, Lattanzi G, Del Coco R, Loidi L, et al. Reduced adipogenic gene expression in fibroblasts from a patient with type 2 congenital generalized lipodystrophy. *Diabet Med.* 2010;27(10):1178-87.

27. Simsir IY, Yurekli BS, Saygili F, Altay C, Akinci B. First metreleptin treatment for generalized lipodystrophy in Turkey. *Diabetes Obes Metab.* 2017;19(2):299-301.

28. Purizaca-Rosillo N, Mori T, Benites-Condor Y, Hisama FM, Martin GM, Oshima J. High incidence of BSCL2 intragenic recombinational mutation in Peruvian type 2 Berardinelli-Seip syndrome. *Am J Med Genet A.* 2017;173(2):471-8.

29. Su X, Lin R, Huang Y, Sheng H, Li X, Ting TH, et al. Clinical and Mutational Features of Three Chinese Children with Congenital Generalized Lipodystrophy. *J Clin Res Pediatr Endocrinol.* 2017;9(1):52-7.

30. Chen R, Yuan X, Wang J, Zhang Y. Clinical and molecular characterization of two Chinese patients with Type 2 congenital generalized lipodystrophy. *Gene*. 2017;637:57-62.
31. Ponte CMM, Fernandes VO, Gurgel MHC, Vasconcelos I, Karbage L, Liberato CBR, et al. Early commitment of cardiovascular autonomic modulation in Brazilian patients with congenital generalized lipodystrophy. *BMC Cardiovasc Disord*. 2018;18(1):6.
32. Lima JG, Nobrega LHC, Lima NN, Dos Santos MCF, Baracho MFP, Winzenrieth R, et al. Normal bone density and trabecular bone score, but high serum sclerostin in congenital generalized lipodystrophy. *Bone*. 2017;101:21-5.
33. Dantas de Medeiros JL, Carneiro Bezerra B, Brito de Araujo TA, Craveiro Sarmiento AS, de Azevedo Medeiros LB, Peroni Gualdi L, et al. Impairment of respiratory muscle strength in Berardinelli-Seip congenital lipodystrophy subjects. *Respir Res*. 2018;19(1):173.
34. Gonzalo MM, Estefania CV. Congenital Generalized Lipodystrophy Type 2 in a Patient From a High-Prevalence Area. *J Endocr Soc*. 2017;1(8):1012-4.

**Table 2** Phenotypical information of adult patients by BSCL type.

|                                       | BSCL type I    | BSCL type II   | P-value |
|---------------------------------------|----------------|----------------|---------|
| Gender(F/M)                           | 31/7           | 33/29          | 0.0080  |
| Mean age (y)                          | 31.24±12.61    | 30.65±8.52     | NS      |
| Weight at birth (g)                   | 2852.50±247.03 | 3141.33±597.05 | NS      |
| Age at onset of diabetes mellitus (y) | 19.71±9.61     | 16.52±8.21     | NS      |
| Diabetes mellitus (yes)               | 32%            | 24%            | NS      |
| Cardiomyopathy (yes)                  | 5%             | 6%             | NS      |
| Hepatopathy (yes)                     | 5%             | 7%             | NS      |
| Nephropathy (yes)                     | 3%             | 1%             | NS      |
| Acromegaly (yes)                      | 13%            | 7%             | NS      |
| Acanthosis nigricans (yes)            | 24%            | 8%             | NS      |
| Hirsutism (yes)                       | 3%             | 0%             | NS      |
| Cysts in bones (yes)                  | 32%            | 3%             | 0.0023  |
| Intellectual disability (yes)         | 5%             | 46%            | 0.0001  |
| Poor growth and short stature (yes)   | 5%             | 2%             | NS      |

Abbreviation: NS, not significant. The continuous variable is presented as mean ± standard deviation, and the categorical variable is presented as a percentage.
